# Supplementary material for: Electron correlation and vibrational effects in predictions of paramagnetic NMR shifts
Source: Royal Society of Chemistry journal article supplement (doi:10.1039/d2cp01206e), 2022-01-01
Supplement: d2cp01206e1.pdf [file d2cp01206e1.pdf]

## ELECTRONIC SUPPLEMENTARY INFORMATION

### Electron correlation and vibrational effects in predictions of paramagnetic NMR shifts

Aleksander Jaworski,\* Niklas Hedin

Department of Materials and Environmental Chemistry,  
Stockholm University, SE-106 91 Stockholm, Sweden

\*Corresponding author: [aleksander.jaworski@mmk.su.se](mailto:aleksander.jaworski@mmk.su.se)

#### Contents

**Table S1: Effects of auxiliary basis sets in DLPNO-CCSD calculations**  
**Table S2:  $^1\text{H}$  and  $^{13}\text{C}$  NMR shieldings for the eclipsed conformer of  $\text{Cp}_2\text{Fe}$**

**Cartesian coordinates (in Å) of the models:**

**Table S3: Cyanomethyl radical**

**Table S4:  $[\text{V}(\text{H}_2\text{O})_6]^{2+}$**

**Table S5:  $[\text{Cr}(\text{H}_2\text{O})_6]^{3+}$**

**Table S6:  $[\text{Mn}(\text{H}_2\text{O})_6]^{2+}$**

**Table S7:  $[\text{Yb}(\text{H}_2\text{O})_8]^{3+}$**

**Table S8: Eclipsed  $\text{Cp}_2\text{V}$**

**Table S9: Staggered  $\text{Cp}_2\text{V}$**

**Table S10: CoSOD model E**

**Table S11: CoSOD model F**

**Table S12:  $\text{CH}_4$**

**Table S13: Eclipsed  $\text{Cp}_2\text{Fe}$**

**Table S1 Convergence of  $^{14}\text{N}$  hyperfine ( $A_{\text{con}}$ ) and quadrupole ( $\chi$ ) coupling constants (MHz) for cyanomethyl radical at the DLPNO-CCSD(HFC1)/aug-cc-pVTZ-J level of theory with respect to the completeness of auxiliary basis sets; molecular geometry optimized at the CCSD(T)/aug-cc-pCVTZ level of theory**

| AuxJ basis set | AuxC basis set | $A_{\text{con}}$ | $\chi$ |
|----------------|----------------|------------------|--------|
| AutoAux        | aug-cc-pCVDZ/C | 9.32             | -4.28  |
| AutoAux        | aug-cc-pCVTZ/C | 9.20             | -4.28  |
| AutoAux        | aug-cc-pCVQZ/C | 9.17             | -4.28  |
| AutoAux        | aug-cc-pCV5Z/C | 9.17             | -4.28  |
| AutoAux        | AutoAux        | 9.17             | -4.28  |
| def2/J         | AutoAux        | 9.17             | -4.29  |
| SARC/J         | AutoAux        | 9.17             | -4.28  |

**Table S2  $^1\text{H}$  and  $^{13}\text{C}$  NMR shieldings for the eclipsed conformer of  $\text{Cp}_2\text{Fe}$  (ferrocene); molecular geometry optimized at the PBE0-D4/cc-pVTZ level of theory**

| Method     | Basis set | $\text{CH}_4$ |                 | $\text{Cp}_2\text{Fe}$ |                 |              |                 | $^{13}\text{C}$ |                       |                              |          |
|------------|-----------|---------------|-----------------|------------------------|-----------------|--------------|-----------------|-----------------|-----------------------|------------------------------|----------|
|            |           | $^1\text{H}$  | $^{13}\text{C}$ | $^1\text{H}$           | $^{13}\text{C}$ | $^1\text{H}$ | $^{13}\text{C}$ | $\delta$        | $\sigma_{\text{orb}}$ | $\sigma_{\text{orb, zpv}}^a$ | $\delta$ |
| PBE        | pcSseg-1  | 31.37         | -0.61           | 189.34                 | -3.47           | 27.49        | -0.51           | 5.94            | 104.12                | -3.53                        | 76.63    |
| PBE0       | pcSseg-1  | 31.33         | -0.61           | 190.92                 | -3.47           | 27.82        | -0.51           | 5.57            | 114.38                | -3.53                        | 67.95    |
| PBE0       | pcSseg-2  | 31.25         | -0.61           | 191.82                 | -3.47           | 27.73        | -0.51           | 5.59            | 111.65                | -3.53                        | 71.58    |
| PBE0       | pcSseg-3  | 31.30         | -0.61           | 191.48                 | -3.47           | 27.67        | -0.51           | 5.69            | 111.14                | -3.53                        | 71.75    |
| PBE0       | pcSseg-4  | 31.30         | -0.61           | 191.44                 | -3.47           | 27.67        | -0.51           | 5.69            | 111.12                | -3.53                        | 71.73    |
| DSD-PBEP86 | pcSseg-2  | 31.28         | -0.61           | 197.02                 | -3.47           | 24.40        | -0.51           | 8.95            | 60.63                 | -3.53                        | 127.80   |
| HF         | pcSseg-2  | 31.46         | -0.61           | 194.45                 | -3.47           | 33.33        | -0.51           | 0.20            | 216.24                | -3.53                        | -30.38   |
| MP2        | pcSseg-2  | 31.24         | -0.61           | 200.61                 | -3.47           | -9.20        | -0.51           | 42.51           | -566.51               | -3.53                        | 758.53   |
| SCS-MP2    | pcSseg-2  | 31.32         | -0.61           | 198.73                 | -3.47           | -5.77        | -0.51           | 39.15           | -500.32               | -3.53                        | 690.46   |
| Experiment |           |               |                 |                        |                 |              |                 | ~4.2            |                       |                              | ~68      |

<sup>a</sup>vibrational corrections to orbital shielding calculated at the VPT2 PBE0-D4/cc-pVTZ//PBE0/pcSseg-2 level

**Table S3 Cyanomethyl radical**

|   |           |           |          |
|---|-----------|-----------|----------|
| N | -1.983162 | 0.208926  | 0.000000 |
| C | -0.811141 | 0.246261  | 0.000000 |
| C | 0.579652  | 0.290493  | 0.000000 |
| H | 1.085689  | 1.243113  | 0.000000 |
| H | 1.145183  | -0.628055 | 0.000000 |

**Table S4  $[\text{V}(\text{H}_2\text{O})_6]^{2+}$**

|   |           |           |           |
|---|-----------|-----------|-----------|
| V | -0.653134 | 0.377780  | 0.049941  |
| O | -1.687545 | 2.256213  | 0.010824  |
| O | -0.486197 | 0.511879  | 2.183767  |
| O | -2.531829 | -0.637011 | 0.267518  |
| O | 0.381064  | -1.500691 | 0.089163  |
| O | 1.225288  | 1.392973  | -0.167703 |
| O | -0.820526 | 0.244162  | -2.083927 |
| H | -1.292634 | 3.129395  | -0.077086 |
| H | -0.063481 | -0.126958 | 2.766314  |
| H | -3.093176 | -0.966484 | -0.441315 |
| H | 1.332166  | -1.629290 | 0.017993  |
| H | 1.657598  | 1.620935  | -0.996750 |
| H | -0.498550 | -0.471460 | -2.641028 |
| H | -1.243378 | 0.883815  | -2.665480 |
| H | -2.638708 | 2.384409  | 0.081920  |
| H | 1.786811  | 1.722164  | 0.541122  |
| H | -0.014191 | -2.373716 | 0.177066  |
| H | -0.808558 | 1.228146  | 2.739818  |
| H | -2.963937 | -0.865355 | 1.096567  |

**Table S5: [Cr(H<sub>2</sub>O)<sub>6</sub>]<sup>3+</sup>**

|    |           |           |           |
|----|-----------|-----------|-----------|
| Cr | -0.653312 | 0.377942  | 0.049934  |
| O  | -1.613789 | 2.126362  | 0.015216  |
| O  | -0.492470 | 0.504635  | 2.034655  |
| O  | -2.400458 | -0.567205 | 0.251994  |
| O  | 0.307162  | -1.370480 | 0.084636  |
| O  | 1.093836  | 1.323082  | -0.152121 |
| O  | -0.814143 | 0.251258  | -1.934789 |
| H  | -1.206681 | 3.003392  | -0.074308 |
| H  | -0.067504 | -0.145910 | 2.616990  |
| H  | -2.960810 | -0.895344 | -0.469971 |
| H  | 1.267690  | -1.494814 | 0.014753  |
| H  | 1.527412  | 1.549878  | -0.990869 |
| H  | -0.482634 | -0.472720 | -2.490597 |
| H  | -1.239117 | 0.901801  | -2.517119 |
| H  | -2.574316 | 2.250699  | 0.085104  |
| H  | 1.654182  | 1.651226  | 0.569846  |
| H  | -0.099943 | -2.247511 | 0.174164  |
| H  | -0.823987 | 1.228611  | 2.590462  |
| H  | -2.834035 | -0.793996 | 1.090743  |

**Table S6: [Mn(H<sub>2</sub>O)<sub>6</sub>]<sup>2+</sup>**

|    |           |           |           |
|----|-----------|-----------|-----------|
| Mn | -0.653313 | 0.377935  | 0.049911  |
| O  | -1.712055 | 2.297903  | 0.011787  |
| O  | -0.478747 | 0.517617  | 2.230640  |
| O  | -2.576888 | -0.657777 | 0.270998  |
| O  | 0.405554  | -1.541972 | 0.088239  |
| O  | 1.270227  | 1.413728  | -0.171243 |
| O  | -0.827998 | 0.238152  | -2.130791 |
| H  | -1.321377 | 3.173383  | -0.077477 |
| H  | -0.059116 | -0.120993 | 2.816431  |
| H  | -3.138902 | -0.987867 | -0.437652 |
| H  | 1.357007  | -1.672296 | 0.018649  |
| H  | 1.707918  | 1.643451  | -0.997507 |
| H  | -0.503858 | -0.475222 | -2.690339 |
| H  | -1.247613 | 0.876772  | -2.716584 |
| H  | -2.663502 | 2.428287  | 0.081341  |
| H  | 1.832256  | 1.743800  | 0.537404  |
| H  | 0.014935  | -2.417482 | 0.177474  |
| H  | -0.802874 | 1.231002  | 2.790179  |
| H  | -3.014570 | -0.887515 | 1.097263  |

**Table S7: [Yb(H<sub>2</sub>O)<sub>8</sub>]<sup>3+</sup>**

|    |           |           |           |
|----|-----------|-----------|-----------|
| Yb | -0.571261 | 0.221571  | 0.032463  |
| O  | 0.650891  | 1.731933  | 1.351865  |
| O  | -1.120287 | 2.383058  | -0.727768 |
| O  | -2.903436 | 0.430646  | 0.219776  |
| O  | -1.289718 | -2.032082 | -0.050452 |
| O  | 1.241543  | -1.110295 | 0.758934  |
| O  | 1.254456  | 0.763827  | -1.370936 |
| O  | -1.118454 | -0.240104 | 2.275320  |
| O  | -1.283052 | -0.167693 | -2.188912 |
| H  | 0.508103  | 1.924188  | 2.289300  |
| H  | -1.563885 | 2.617653  | -1.555198 |
| H  | -3.549437 | -0.275591 | 0.361478  |
| H  | -1.497259 | -2.604700 | 0.701103  |
| H  | 2.060174  | -0.825763 | 1.188746  |
| H  | 1.331997  | 1.532220  | -1.953576 |
| H  | -0.965078 | 3.217843  | -0.263836 |
| H  | 1.398100  | 2.282907  | 1.079369  |
| H  | -0.554795 | -0.659654 | 2.940588  |
| H  | -2.184710 | -0.324378 | -2.502540 |
| H  | -1.948346 | -0.028234 | 2.725468  |
| H  | 2.074611  | 0.262828  | -1.481999 |
| H  | 1.326688  | -2.064869 | 0.626578  |
| H  | -1.443500 | -2.565868 | -0.842588 |
| H  | -3.414162 | 1.250709  | 0.166306  |
| H  | -0.711527 | -0.251734 | -2.964993 |

**Table S8: Eclipsed Cp<sub>2</sub>V**

|   |           |           |           |
|---|-----------|-----------|-----------|
| V | 0.000000  | 0.000000  | 0.000000  |
| C | -0.742794 | -0.942403 | 1.931032  |
| C | -1.124140 | 0.419878  | 1.930815  |
| C | 0.670633  | -1.000721 | 1.927834  |
| C | 1.162913  | 0.325525  | 1.925699  |
| C | 0.053658  | 1.203557  | 1.927509  |
| H | 2.202379  | 0.616467  | 1.922736  |
| H | 0.098252  | 2.282058  | 1.926543  |
| H | -2.136087 | 0.795510  | 1.933059  |
| H | -1.412787 | -1.788712 | 1.933167  |
| H | 1.268524  | -1.899431 | 1.926857  |
| C | -0.744023 | -0.941375 | -1.931059 |
| C | -1.123451 | 0.421442  | -1.930874 |
| C | 0.669321  | -1.001683 | -1.927791 |
| C | 1.163466  | 0.323870  | -1.925647 |

|   |           |           |           |
|---|-----------|-----------|-----------|
| C | 0.055449  | 1.203462  | -1.927521 |
| H | 2.203341  | 0.613348  | -1.922635 |
| H | 0.101562  | 2.281899  | -1.926564 |
| H | -1.415206 | -1.786740 | -1.933218 |
| H | -2.134867 | 0.798497  | -1.933175 |
| H | 1.265946  | -1.901234 | -1.926778 |

**Table S9: Staggered Cp<sub>2</sub>V**

|   |           |           |           |
|---|-----------|-----------|-----------|
| V | 0.000000  | 0.000000  | 0.000000  |
| C | -0.400221 | -1.134789 | 1.929645  |
| C | -1.203540 | 0.029619  | 1.929208  |
| C | 0.955383  | -0.730619 | 1.930229  |
| C | 0.989955  | 0.683495  | 1.930105  |
| C | -0.344306 | 1.153420  | 1.929483  |
| H | 1.878511  | 1.296414  | 1.929193  |
| H | -0.652587 | 2.187901  | 1.928106  |
| H | -2.282654 | 0.056049  | 1.927739  |
| H | -0.758772 | -2.152934 | 1.928593  |
| H | 1.812852  | -1.386317 | 1.929478  |
| C | -1.013598 | -0.648093 | -1.929999 |
| C | -0.929454 | 0.763940  | -1.929876 |
| C | 0.303375  | -1.164522 | -1.929725 |
| C | 1.201485  | -0.071542 | -1.929395 |
| C | 0.439478  | 1.120313  | -1.929452 |
| H | 2.279007  | -0.135768 | -1.928194 |
| H | 0.833460  | 2.125278  | -1.928292 |
| H | -1.923101 | -1.229484 | -1.929074 |
| H | -1.763439 | 1.449256  | -1.928763 |
| H | 0.575227  | -2.209168 | -1.928662 |

**Table S10: CoSOD model E**

|    |           |           |           |
|----|-----------|-----------|-----------|
| Co | 0.000000  | 0.000000  | 0.000000  |
| C  | -1.304370 | -3.831830 | -0.760260 |
| C  | -0.955630 | -2.368510 | -0.905200 |
| O  | -0.011660 | -1.932930 | -0.153390 |
| O  | -1.579070 | -1.630820 | -1.686810 |
| N  | 1.125440  | 0.367760  | 1.668030  |
| N  | -1.899570 | 0.333790  | 0.683950  |
| N  | 0.815640  | 1.030240  | -1.554570 |
| H  | 5.053450  | 1.183760  | 1.372220  |
| C  | 4.885730  | 0.137480  | 1.075900  |
| H  | 5.532970  | -0.083940 | 0.216000  |
| C  | 3.423740  | -0.112250 | 0.730910  |
| C  | 2.486750  | 0.202300  | 1.849000  |
| C  | 2.763150  | 0.374020  | 3.183460  |
| C  | 0.604030  | 0.632220  | 2.859320  |
| N  | 1.563520  | 0.639980  | 3.791580  |
| H  | 5.216070  | -0.505640 | 1.906970  |
| H  | 3.132590  | 0.490890  | -0.144630 |
| H  | 3.276750  | -1.166100 | 0.432890  |
| H  | 3.694340  | 0.324530  | 3.740260  |
| H  | -0.444430 | 0.827800  | 3.071350  |
| H  | 1.422760  | 0.815820  | 4.780660  |
| H  | -3.020050 | 2.280140  | -2.969800 |
| C  | -3.128270 | 1.507480  | -2.192100 |
| C  | -4.512530 | 0.991990  | -2.242810 |
| O  | -5.494250 | 1.715520  | -2.135960 |
| C  | -2.824610 | 2.147410  | -0.826930 |
| C  | -2.927730 | 1.167680  | 0.291930  |
| C  | -4.044850 | 0.839580  | 1.021920  |
| C  | -2.387780 | -0.476490 | 1.615490  |
| N  | -3.677260 | -0.192800 | 1.842330  |
| H  | -2.392490 | 0.7117360 | -2.400120 |
| H  | -1.821330 | 2.597350  | -0.839340 |
| H  | -3.541150 | 2.963100  | -0.653080 |
| H  | -5.051620 | 1.247630  | 1.004290  |
| H  | -1.842270 | -1.269270 | 2.124930  |
| H  | -4.274310 | -0.666820 | 2.511700  |
| N  | -4.560590 | -0.338450 | -2.403790 |
| C  | -5.821270 | -0.974520 | -2.470100 |
| H  | -5.833300 | -1.754260 | -3.246900 |
| H  | -3.703450 | -0.879320 | -2.315120 |
| H  | -6.109230 | -1.446030 | -1.513590 |
| H  | -6.577930 | -0.218680 | -2.711920 |
| H  | -2.925180 | -1.741380 | -6.336320 |
| C  | -2.487270 | -1.849510 | -5.337100 |
| C  | -0.987700 | -1.713690 | -5.436840 |
| O  | -0.367820 | -2.017960 | -6.444060 |
| H  | -2.712700 | -2.860340 | -4.962910 |
| H  | -2.933490 | -1.120000 | -4.647140 |
| N  | -0.342320 | -1.262760 | -4.319640 |
| C  | 1.076730  | -1.486510 | -4.248100 |
| C  | 1.332540  | -3.008850 | -4.120610 |
| O  | 0.530010  | -3.719080 | -3.529980 |
| C  | 1.677370  | -0.891340 | -2.957140 |
| C  | 1.454610  | 0.561150  | -2.691330 |

|   |           |           |           |
|---|-----------|-----------|-----------|
| C | 1.907140  | 1.647860  | -3.399310 |
| C | 0.893880  | 2.353950  | -1.581060 |
| N | 1.540040  | 2.754260  | -2.682440 |
| H | -0.846890 | -1.321170 | -3.429200 |
| H | 1.564750  | -1.082710 | -5.146550 |
| H | 1.287300  | -1.459720 | -2.098470 |
| H | 2.763070  | -1.079130 | -2.982440 |
| H | 2.462020  | 1.717260  | -4.330710 |
| H | 0.514250  | 3.035980  | -0.822860 |
| H | 1.730690  | 3.718880  | -2.933090 |
| N | 2.511670  | -3.495210 | -4.565260 |
| C | 2.771730  | -4.919510 | -4.529100 |
| C | 2.958570  | -5.537290 | -3.139290 |
| O | 2.867200  | -6.743370 | -3.004110 |
| H | 3.683210  | -5.125170 | -5.107250 |
| H | 3.098410  | -2.909130 | -5.147490 |
| H | 1.946880  | -5.482470 | -4.990050 |
| N | 3.234310  | -4.692600 | -2.112850 |
| C | 3.336730  | -5.132510 | -0.739100 |
| C | 2.076760  | -4.962920 | 0.093880  |
| O | 2.132080  | -5.044160 | 1.312840  |
| H | 3.311920  | -3.704960 | -2.322440 |
| H | 3.577510  | -6.206970 | -0.747080 |
| H | 4.155310  | -4.613750 | -0.220750 |
| N | 0.942080  | -4.772380 | -0.597080 |
| C | -0.327270 | -4.651510 | 0.067900  |
| H | -0.762570 | -5.649570 | 0.253330  |
| H | 0.970520  | -4.682270 | -1.610390 |
| H | -0.153860 | -4.186030 | 1.048250  |
| H | -1.419840 | -4.243340 | -1.775020 |
| H | -2.306620 | -3.872750 | -0.302520 |

**Table S11: CoSOD model F**

|    |           |           |           |
|----|-----------|-----------|-----------|
| Co | 0.000000  | 0.000000  | 0.000000  |
| C  | 3.774690  | 0.418420  | -1.592570 |
| C  | 2.337650  | 0.053930  | -1.326440 |
| O  | 1.690160  | 0.807250  | -0.524860 |
| O  | 1.814800  | -0.947720 | -1.853390 |
| N  | -0.531380 | 1.168860  | 1.587880  |
| N  | 0.649900  | -1.721180 | 0.899820  |
| N  | -1.477750 | -0.073430 | -1.398870 |
| H  | -3.323090 | 3.851800  | 0.997570  |
| C  | -2.414260 | 4.269790  | 0.540730  |
| H  | -2.689970 | 4.745170  | -0.411180 |
| C  | -1.360680 | 3.190130  | 0.319130  |
| C  | -0.959110 | 2.483250  | 1.571360  |
| C  | -0.924380 | 2.957930  | 2.859990  |
| C  | -0.247980 | 0.865980  | 2.848700  |
| N  | -0.471820 | 1.923430  | 3.636910  |
| H  | -2.036860 | 5.064470  | 1.203360  |
| H  | -1.732480 | 2.437290  | -0.394050 |
| H  | -0.458750 | 3.628190  | -0.145090 |
| H  | -1.172140 | 3.928790  | 3.279340  |
| H  | 0.103850  | -0.095440 | 3.215380  |
| H  | -0.333230 | 1.949150  | 4.641480  |
| H  | -1.282830 | -4.107030 | -2.081370 |
| C  | -0.450260 | -3.656210 | -1.523270 |
| C  | 0.761190  | -4.549690 | -1.675630 |
| O  | 0.676750  | -5.759520 | -1.508110 |
| C  | -0.829280 | -3.562810 | -0.034280 |
| C  | 0.282850  | -3.050350 | 0.817340  |
| C  | 1.184180  | -3.786960 | 1.547650  |
| C  | 1.744390  | -1.664980 | 1.649340  |
| N  | 2.087610  | -2.893880 | 2.057120  |
| H  | -0.256870 | -2.652180 | -1.930880 |
| H  | -1.722490 | -2.933470 | 0.088780  |
| H  | -1.099090 | -4.567300 | 0.321860  |
| H  | 1.255250  | -4.856970 | 1.722210  |
| H  | 2.305310  | -0.765220 | 1.898300  |
| H  | 2.884650  | -3.117530 | 2.643690  |
| N  | 1.917840  | -3.908310 | -1.949820 |
| C  | 3.170740  | -4.610210 | -2.043270 |
| H  | 3.718680  | -4.317440 | -2.951790 |
| H  | 1.926190  | -2.886630 | -1.951530 |
| H  | 3.815720  | -4.411480 | -1.170510 |
| H  | 2.959750  | -5.686180 | -2.080160 |
| H  | 1.832340  | -3.267650 | -6.142120 |
| C  | 1.958740  | -2.549210 | -5.323270 |
| C  | 1.141620  | -1.320990 | -5.604870 |
| O  | 0.860420  | -0.944220 | -6.732100 |
| H  | 3.020830  | -2.259660 | -5.282130 |
| H  | 1.696050  | -3.019170 | -4.365720 |
| N  | 0.746530  | -0.632820 | -4.500790 |
| C  | 0.202740  | 0.673790  | -4.657270 |
| C  | 1.340120  | 1.712870  | -4.944520 |
| O  | 2.474180  | 1.507200  | -4.538000 |
| C  | -0.416830 | 1.172970  | -3.332650 |

|   |           |           |           |
|---|-----------|-----------|-----------|
| C | -1.494010 | 0.338680  | -2.722050 |
| C | -2.694940 | -0.043040 | -3.267650 |
| C | -2.640640 | -0.666040 | -1.161380 |
| N | -3.389700 | -0.670210 | -2.269480 |
| H | 1.185090  | -0.844870 | -3.600090 |
| H | -0.530620 | 0.676850  | -5.477390 |
| H | 0.388990  | 1.294100  | -2.592920 |
| H | -0.820370 | 2.183250  | -3.509440 |
| H | -3.105190 | 0.092430  | -4.264370 |
| H | -2.966990 | -1.081910 | -0.210360 |
| H | -4.320890 | -1.065590 | -2.346610 |
| N | 0.988660  | 2.895080  | -5.514560 |
| C | 1.958740  | 3.946790  | -5.815270 |
| C | 2.604340  | 4.609880  | -4.615330 |
| O | 3.653790  | 5.214770  | -4.734420 |
| H | 1.450270  | 4.723590  | -6.402750 |
| H | 0.068670  | 2.971240  | -5.932470 |
| H | 2.784880  | 3.554110  | -6.427200 |
| N | 1.928300  | 4.497030  | -3.450310 |
| C | 2.442740  | 5.018790  | -2.222270 |
| C | 3.089180  | 3.991260  | -1.289030 |
| O | 3.247560  | 4.263180  | -0.107870 |
| H | 1.051240  | 3.991840  | -3.455210 |
| H | 3.219230  | 5.758990  | -2.470060 |
| H | 1.663990  | 5.534640  | -1.642920 |
| N | 3.490730  | 2.836440  | -1.855580 |
| C | 4.164740  | 1.800790  | -1.103270 |
| H | 5.259810  | 1.917850  | -1.186380 |
| H | 3.318210  | 2.673970  | -2.845570 |
| H | 3.897660  | 1.938300  | -0.047130 |
| H | 3.952780  | 0.301350  | -2.672830 |
| H | 4.397640  | -0.345020 | -1.096930 |

**Table S12: CH<sub>4</sub>**

|   |           |           |           |
|---|-----------|-----------|-----------|
| C | -0.009688 | 0.019687  | -0.015115 |
| H | 1.046244  | 0.257503  | -0.134597 |
| H | -0.501753 | 0.819463  | 0.536298  |
| H | -0.111373 | -0.915406 | 0.533597  |
| H | -0.471889 | -0.082788 | -0.995776 |

**Table S13: Eclipsed Cp<sub>2</sub>Fe**

|    |           |           |           |
|----|-----------|-----------|-----------|
| Fe | 0.006391  | 0.001200  | 0.000001  |
| C  | -0.742424 | -0.945682 | 1.649043  |
| C  | -1.124967 | 0.421762  | 1.649275  |
| C  | 0.676246  | -1.004533 | 1.648103  |
| C  | 1.170640  | 0.326575  | 1.647537  |
| C  | 0.057400  | 1.208126  | 1.648416  |
| H  | 2.209082  | 0.617023  | 1.623052  |
| H  | 0.102118  | 2.285518  | 1.624812  |
| H  | -2.135854 | 0.797148  | 1.626593  |
| H  | -1.411949 | -1.790981 | 1.626006  |
| H  | 1.273357  | -1.902428 | 1.624069  |
| C  | -0.743307 | -0.944936 | -1.649070 |
| C  | -1.124454 | 0.422899  | -1.649337 |
| C  | 0.675302  | -1.005237 | -1.648059 |
| C  | 1.171056  | 0.325365  | -1.647479 |
| C  | 0.058717  | 1.208053  | -1.648425 |
| H  | 2.209792  | 0.614754  | -1.622948 |
| H  | 0.104536  | 2.285400  | -1.624836 |
| H  | -1.413696 | -1.789550 | -1.626060 |
| H  | -2.134958 | 0.799316  | -1.626715 |
| H  | 1.271492  | -1.903743 | -1.623988 |
